# Supplementary material for: Interconnected MoS2/FeCo2S4 nanosheet array bifunctional electrocatalysts grown on carbon cloth for efficient overall water splitting
Source: Royal Society of Chemistry journal article supplement (doi:10.1039/d2nj01487d), 2022-01-01
Supplement: d2nj01487d1.pdf [file d2nj01487d1.pdf]

# Interconnected $\text{MoS}_2/\text{FeCo}_2\text{S}_4$ nanosheet array bifunctional electrocatalysts grown on carbon cloth for efficient overall water splitting

Jiaying Shen <sup>a</sup>, Jilai Zhang <sup>a</sup>, Guannan Zhang <sup>a</sup>, Wenhua Li <sup>a</sup>, Meng Zheng <sup>a</sup>, Fengye Guo <sup>a</sup>,

Qianqiao Chen <sup>a\*</sup>

<sup>a</sup>: Nanjing University of Science and Technology, Nanjing, People's Republic of China, 210094

\* Corresponding author

E-mail: cq@njust.edu.cn (Qianqiao Chen)

Supporting information

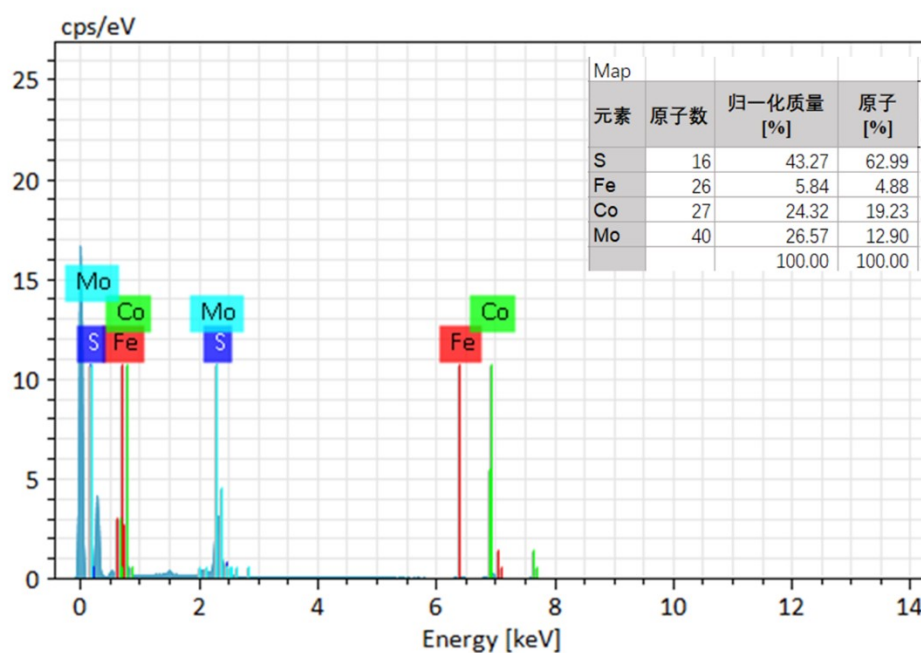

**Figure. S1** EDX spectrum and the element analysis table (inset) of  $\text{MoS}_2/\text{FeCo}_2\text{S}_4/\text{CC}$ .

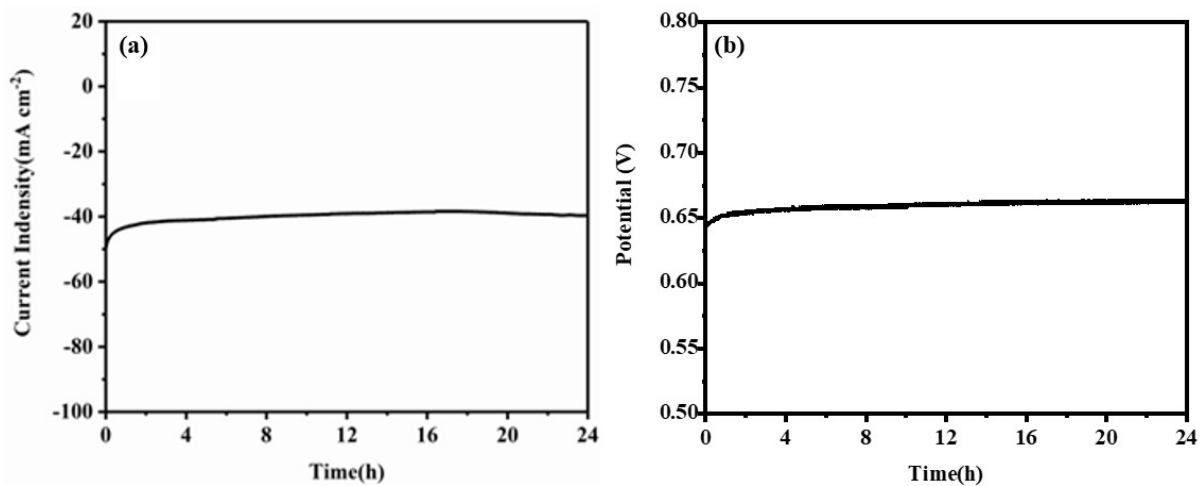

**Figure. S2** (a) The chronoamperometry test of  $\text{MoS}_2/\text{FeCo}_2\text{S}_4/\text{CC}$  at a constant potential of 228 mV; (b) the chronopotentiometry test of  $\text{MoS}_2/\text{FeCo}_2\text{S}_4/\text{CC}$  at a constant current density of 50 mA  $\text{cm}^{-2}$ .

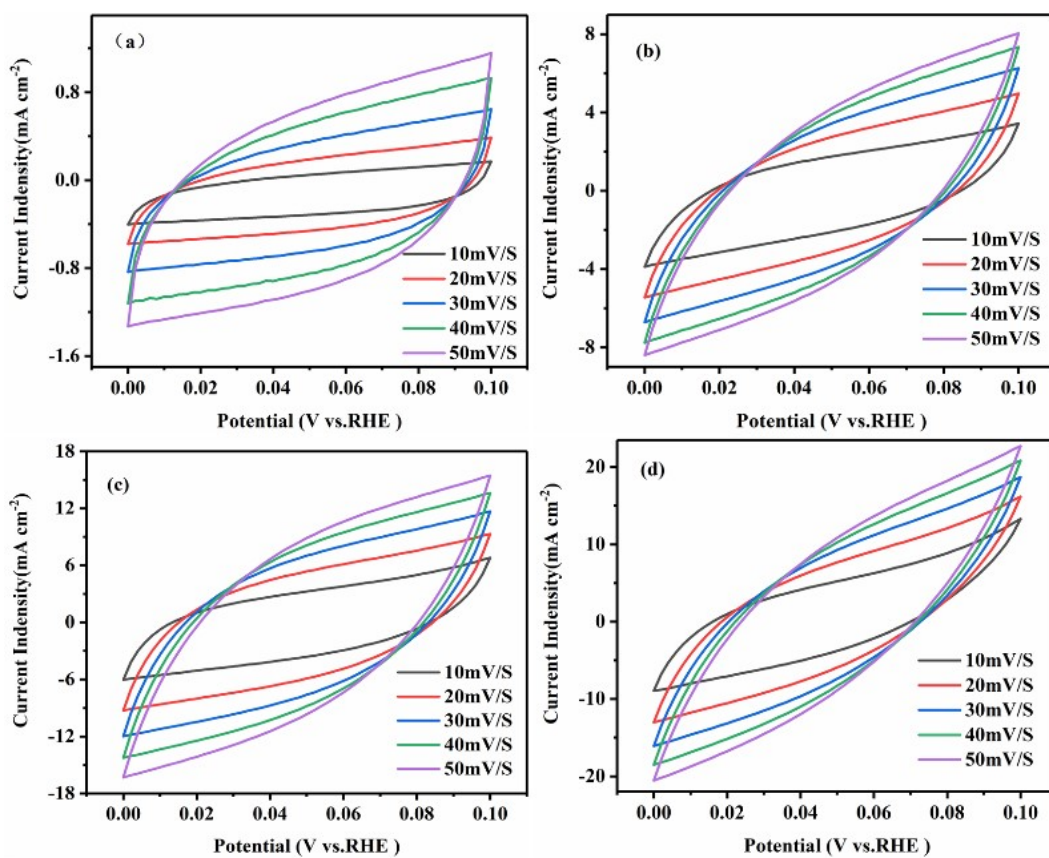

**Figure S3.** CV curves of (a) FeCoMo-LDH/CC; (b)  $\text{FeCo}_2\text{S}_4/\text{CC}$ ; (c)  $\text{MoS}_2/\text{CC}$ ; (d)  $\text{MoS}_2/\text{FeCo}_2\text{S}_4/\text{CC}$  in 1 M KOH.

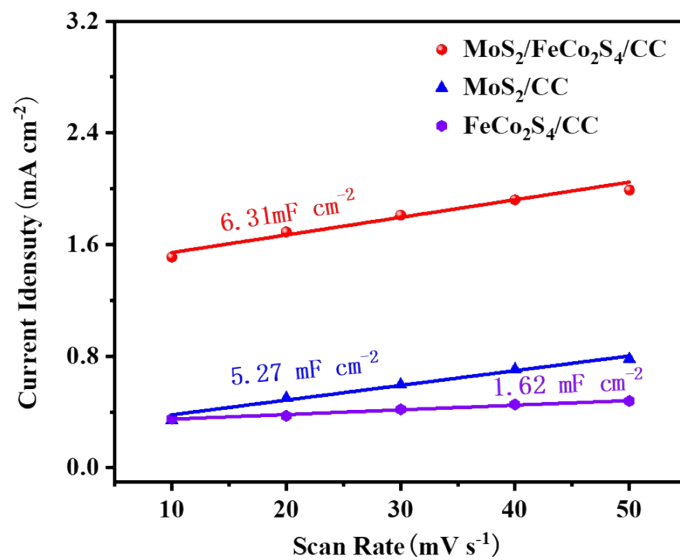

Figure. S4  $C_{dl}$  of the MoS<sub>2</sub>/FeCo<sub>2</sub>S<sub>4</sub>/CC, MoS<sub>2</sub>/CC and FeCo<sub>2</sub>S<sub>4</sub>/CC.

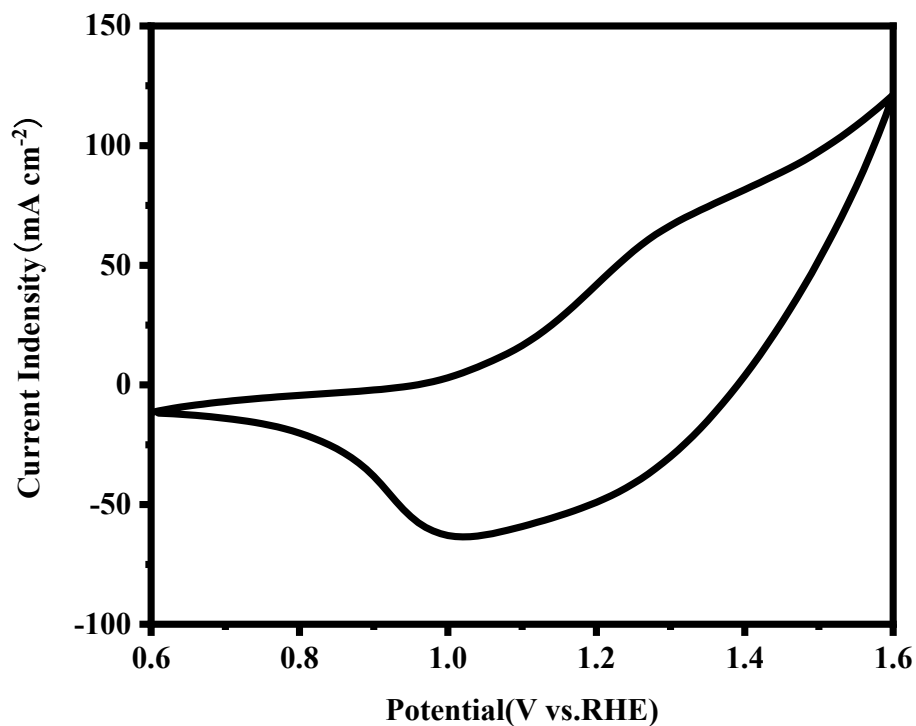

Figure. S5 Cyclic voltammogram of the MoS<sub>2</sub>/FeCo<sub>2</sub>S<sub>4</sub>/CC in 1.0 M KOH solution at scan rate of 100 mV s<sup>-1</sup> in the potential range 0.6 to 1.6 V

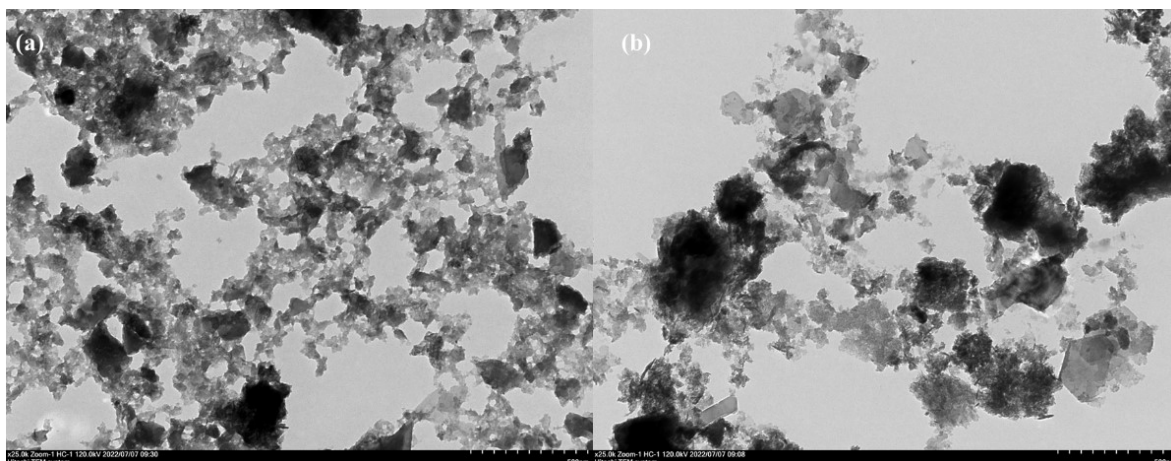

Figure. S6 TEM of the (a)fresh and (b) recovered  $\text{MoS}_2/\text{FeCo}_2\text{S}_4/\text{CC}$

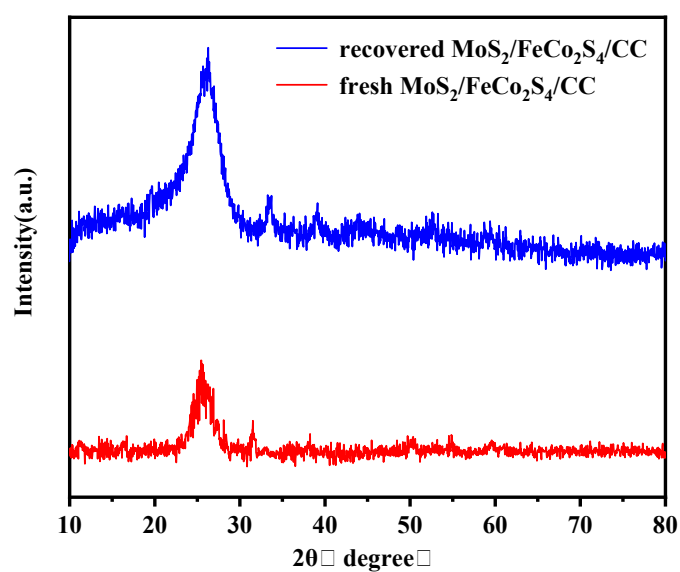

Figure. S7 XRD pattern of recovered  $\text{MoS}_2/\text{FeCo}_2\text{S}_4/\text{CC}$ .

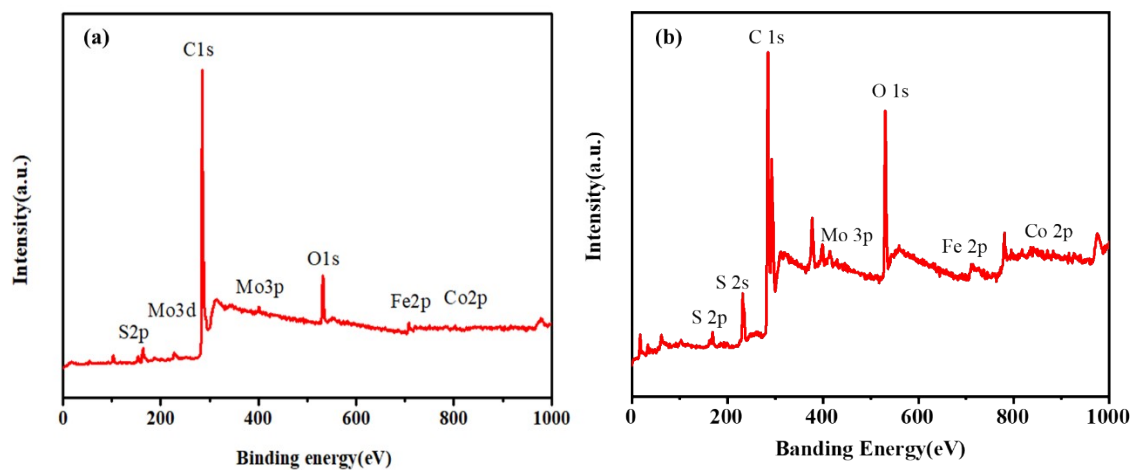

Figure. S8 XPS full spectrum of (a)fresh and(b)recovered  $\text{MoS}_2/\text{FeCo}_2\text{S}_4/\text{CC}$

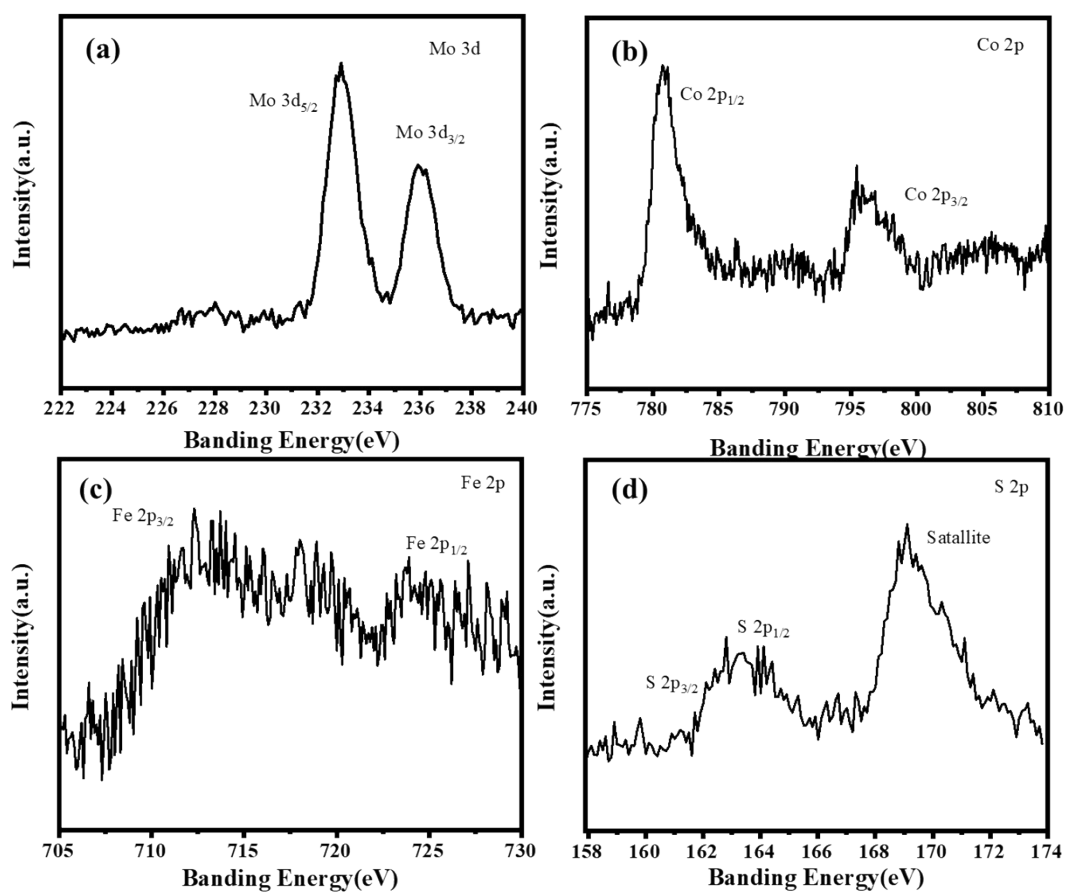

**Figure. S9** XPS spectra of (a) Mo 3d, (b) Co 2p, (c) Fe 2p, and (d) S 2p of recovered  $\text{MoS}_2/\text{FeCo}_2\text{S}_4/\text{CC}$ .
